# Supplementary material for: Single crystalline Sr germanate nanowires and their photocatalytic performance for the degradation of methyl blue
Source: Royal Society of Chemistry journal article supplement (doi:10.1039/c3ce40989a), 2013-01-01
Supplement: c3ce40989a.pdf [file c3ce40989a.pdf]

# Single crystalline Sr germanate nanowires and their photocatalytic performance for the degradation of methyl blue

L. Z. Pei<sup>1,\*</sup>, S. Wang<sup>1</sup>, Y. X. Jiang<sup>1</sup>, Y. K. Xie<sup>1</sup>, Y. Li<sup>1</sup>, Y. H. Guo<sup>2</sup>

<sup>1</sup> Key Lab of Materials Science and Processing of Anhui Province, School of Materials Science and Engineering, Anhui University of Technology, Ma'anshan, Anhui 243002, P. R. China

<sup>2</sup> Department of Materials Science, Fudan University, Shanghai 200433, P. R. China

Fig. S1 shows TOC degradation efficiency for MB treated by Sr germanate nanowires in 10 ml MB solution after different irradiation times. Sr germanate nanowires, 10 mg; MB, 10 mgL<sup>-1</sup>.

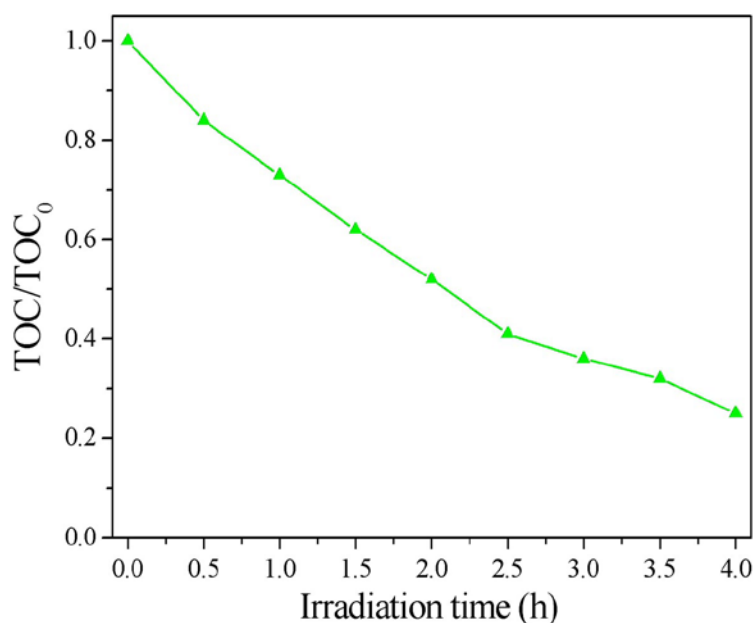

Fig. S1 TOC degradation efficiency for MB treated by Sr germanate nanowires in 10 ml MB solution after different irradiation times. Sr germanate nanowires, 10 mg; MB, 10 mgL<sup>-1</sup>.

\* Corresponding author. Fax: +865552311570.  
E-mail addresses: lzpei@ahut.edu.cn, lzpei1977@163.com (L. Z. Pei).

Fig. S2 shows the SEM image of the bulk Sr germanate prepared from by solid state reaction using Sr carbonate and Ge dioxide as the raw materials at 1200 °C in air.

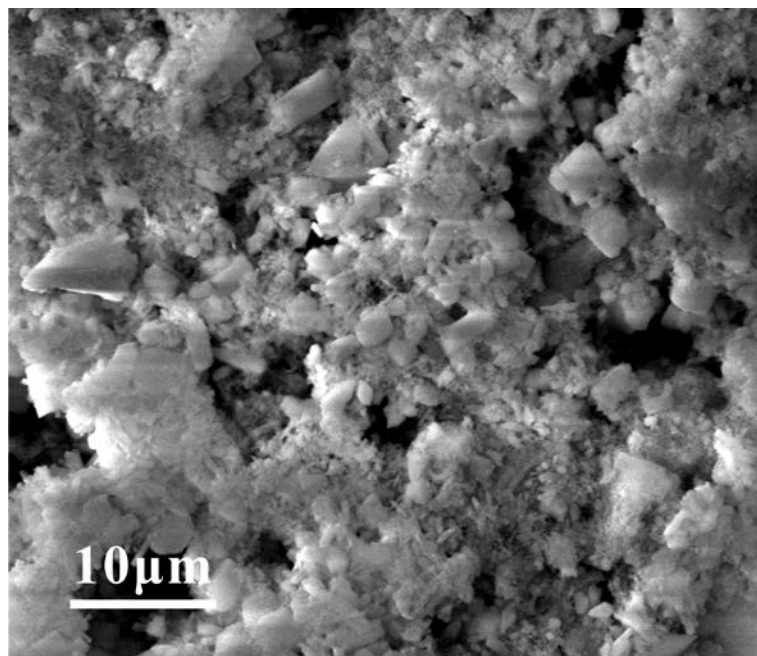

Fig. S2 SEM image of bulk Sr germanate.

Fig. S3(a) displays the UV-vis spectra of the MB solution treated after the irradiation using 10 mg bulk Sr germanate in 10 mgL<sup>-1</sup> MB solution. Fig. S3(b) indicates the MB concentration ratio after the irradiation for different times from 0 to 4 h.

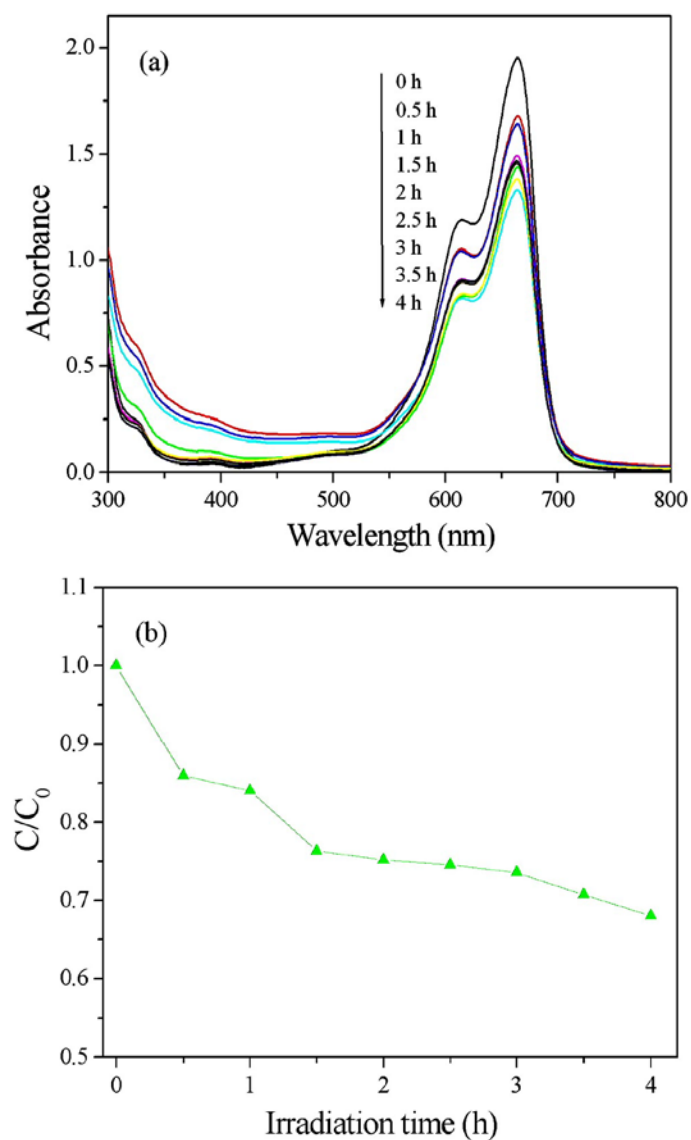

Fig. S3 (a) Absorbance spectra of MB solution after different irradiation times in 10 ml MB solution treated by bulk Sr germanate in 10 ml MB solution. (b) MB concentration ratio after different irradiation times. Bulk Sr germanate, 10 mg; MB, 10 mgL<sup>-1</sup>.

Fig. S4 shows the absorbance spectra of MB solution (a) and MB concentration ratio (b) treated using bulk Sr germanate with different contents in 10 ml MB solution. Irradiation time, 4 h; MB, 10 mgL<sup>-1</sup>.

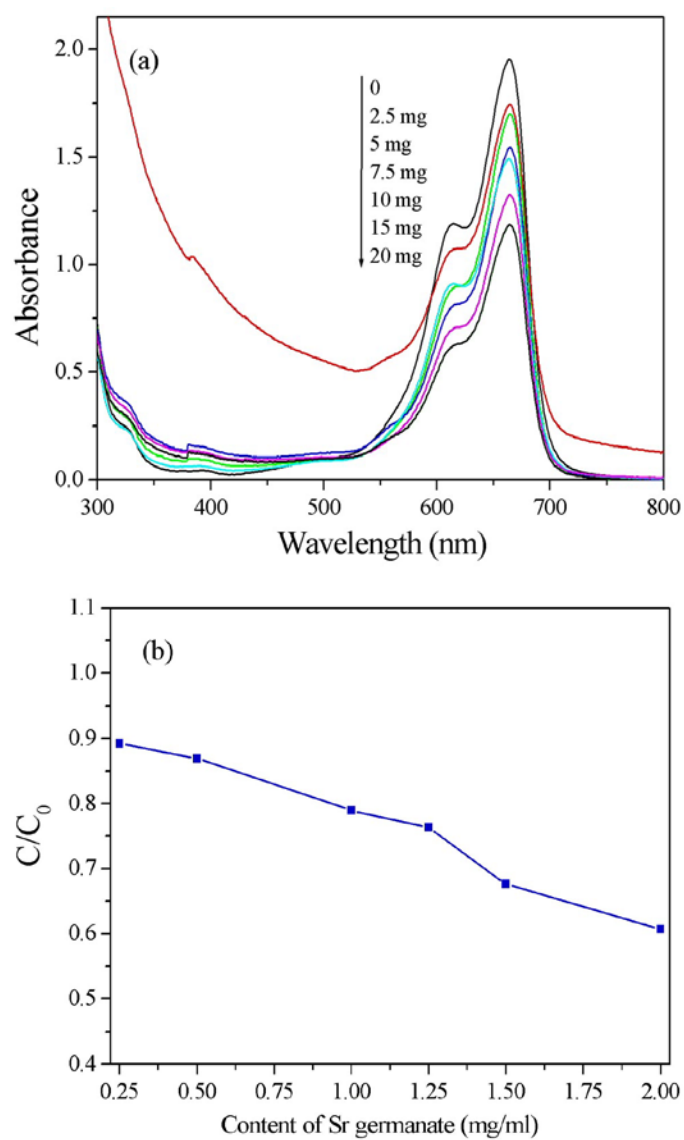

Fig. S4 Absorbance spectra of MB solution (a) and MB concentration ratio (b) treated using bulk Sr germanate with different contents in 10 ml MB solution. Irradiation time, 4 h; MB, 10 mgL<sup>-1</sup>.
